# Supplementary material
Source: Springer Nature journal article supplement (https://www.springermedizin.de/resource/supplementary/12936_2007_574_MOESM1_ESM.pdf/9548322)

**A**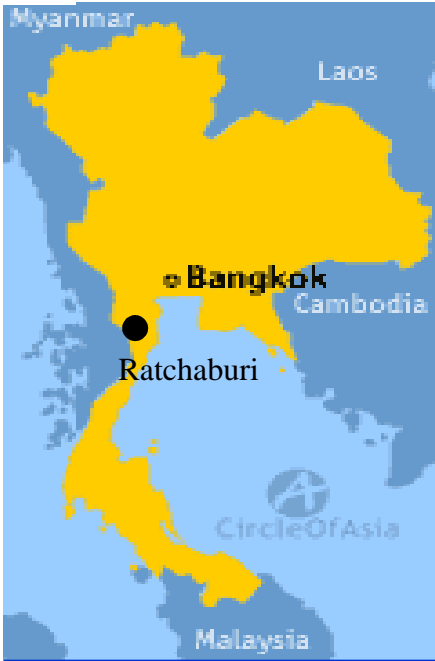**B****Map of Ratchaburi**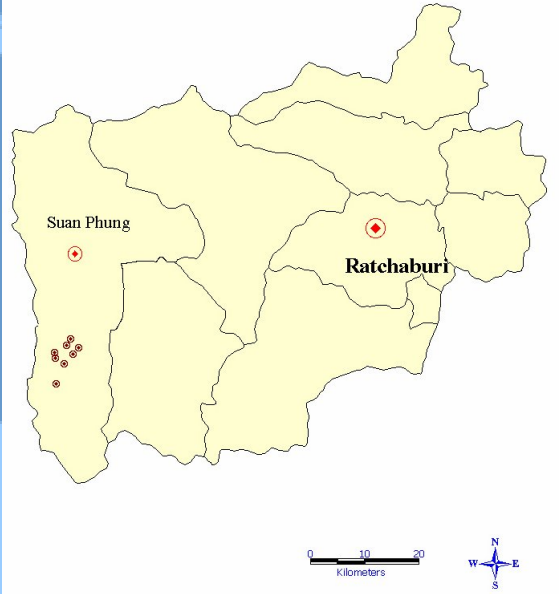**C**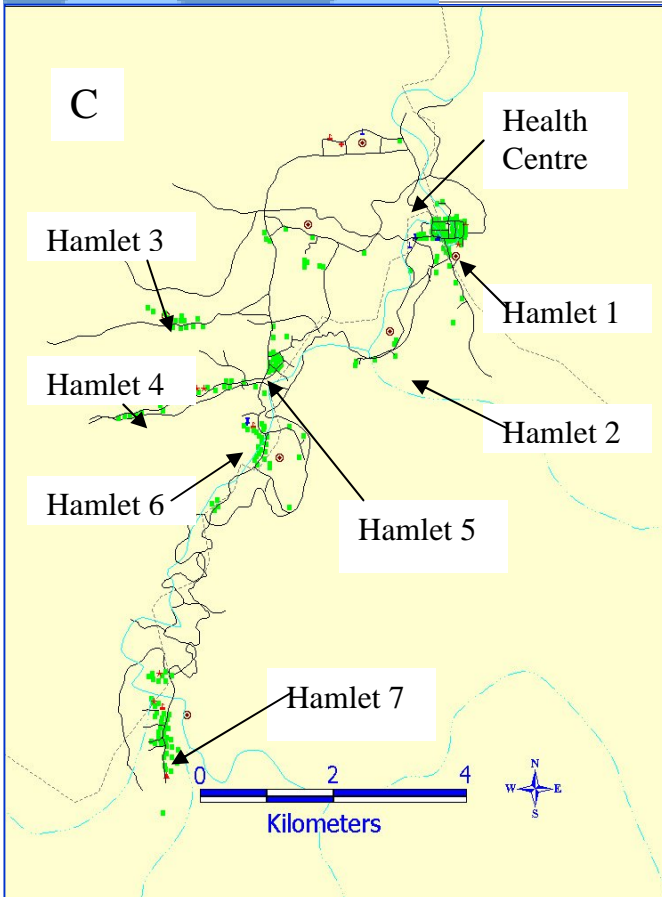

Supplement: MOESM1 [file 9548322]
